# Supplementary material
Source: publisher figshare collection journal article supplement (https://asha.figshare.com/articles/dataset/_/14608101)
Supplement: Supplementary file 1 [file 1]

## Supplemental Material S3. Example of informed consent visuals used to ensure comprehension of study procedures for aphasia group.

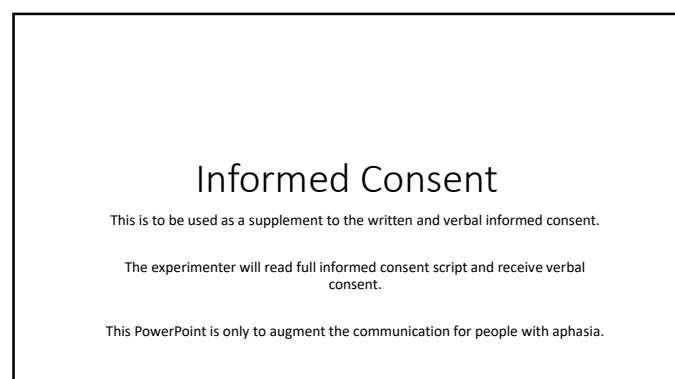

1

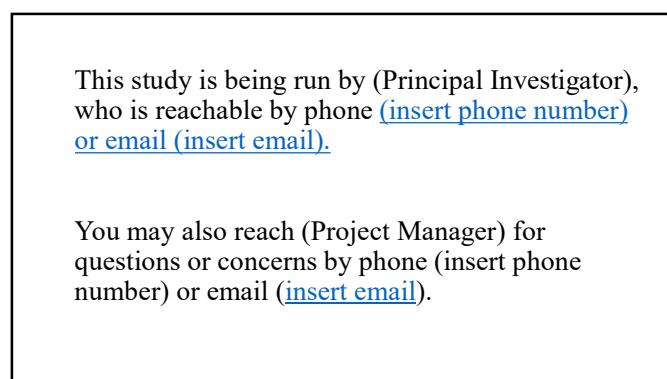

2

We employed a PowerPoint with large visuals, large text, short sentences, bolding for emphasis.

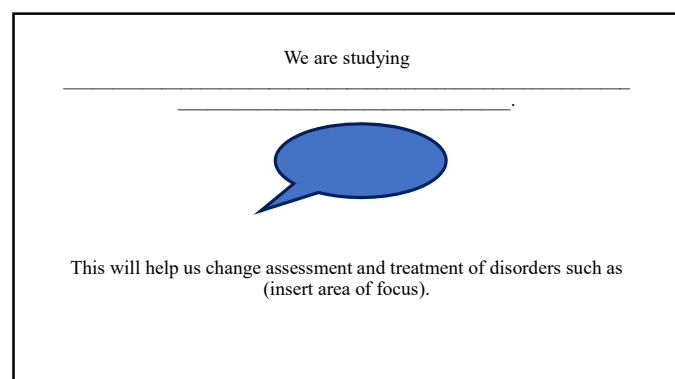

3

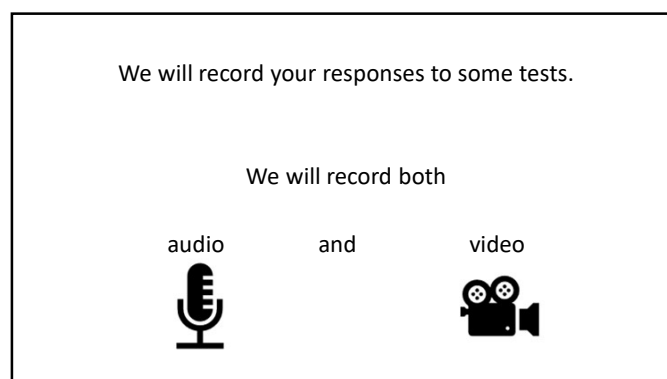

4

Investigator begins by explaining study: we are evaluating how similar your speech (like storytelling) is across two different sessions. We will also do some other assessments, like attention and naming.

Investigator makes clear how data will be acquired: We will record your responses to some tests. We will record both audio Radio microphone and video

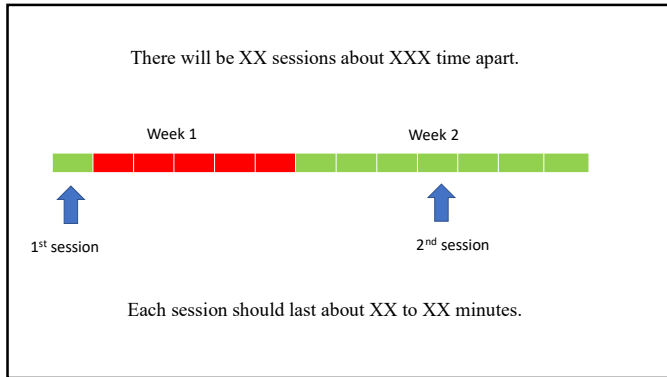

5

Investigator describes study commitment: There will be 2 sessions about one week apart. Each session should last between 1 and 2 hours.

**We do our best to keep your data safe.**

We use only secure systems.

We use (insert your HIPAA compliant video conferencing name) to meet for our sessions.

Insert Video Conferencing system's Logo Here

We save all videos and information to (insert your HIPAA compliant cloud server/database).

Insert Cloud Server and/or Database logo here

6

Investigator describes where data is kept and how information is kept safe: We will use Zoom (for example) to acquire data. Data is kept on a system called REDCap.

**We do our best to protect your identity**

Your data will be assigned to a unique and anonymous ID number.

✓ RC #                      Not your name.                      ~~John~~

7

We won't use your name on any data. You will be assigned a special ID instead.

**Your participation is voluntary**

You may choose to stop participating at any time.

8

Description of voluntary participation. You may choose to stop participating at any time.

Do you have any questions?

? ? ?

9

Investigator asks: What questions do you have?
