# Supplementary material
Source: publisher figshare collection journal article supplement (https://asha.figshare.com/articles/dataset/_/14608101)
Supplement: Supplementary file 5 [file 1]

**Uw rigo gpcnO cvgt knS4. Recruitment flyer.** Designed to be easily accessible to all populations. Redacted information regarding investigator contact information, and specific software systems.



# Do you have aphasia?

You can join a virtual study about language.

Information about study, its sponsor, and identity of investigators

## Requirements

- ✓ You have a diagnosis of aphasia from a brain injury (e.g. stroke, encephalitis, etc.).
- ✓ It has been six months since the injury.
- ✓ You do not have other neurological disorders (e.g. epilepsy).
- ✓ You do not have a neurodegenerative disease (e.g. Alzheimer's disease).
- ✓ You are 18 years or older.
- ✓ You are a native English speaker.

Information about videoconferencing and its safety here

Payment information here

IRB approval number here

Investigator contact information here
